# Supplementary material for: Preterm gut microbiota and metabolome following discharge from intensive care
Source: PubMed Central journal article supplement (PMC4657104; doi:10.1038/srep17141), 2015-11-24
Supplement: srep17141-s3.pdf [file srep17141-s3.pdf]

## **Supplementary Information**

### **Preterm gut microbiota and metabolome following discharge from intensive care**

Christopher J Stewart<sup>1,\*</sup>, Tom Skeath<sup>2</sup>, Andrew Nelson<sup>1</sup>, Sara J Fernstad<sup>3</sup>, Emma CL Marrs<sup>4</sup>,  
John D Perry<sup>4</sup>, Stephen P Cummings<sup>1</sup>, Janet E Berrington<sup>2</sup>, Nicholas D Embleton<sup>2</sup>

<sup>1</sup>Faculty of Health and Life Sciences, Northumbria University, Newcastle upon Tyne, United Kingdom

<sup>2</sup>Newcastle Neonatal Service, Royal Victoria Infirmary, Newcastle upon Tyne, United Kingdom

<sup>3</sup>Department of Computer Science and Digital Technologies, Northumbria University, Newcastle upon Tyne, United Kingdom

<sup>4</sup>Department of Microbiology, Freeman Hospital, Newcastle upon Tyne, United Kingdom

\*[christopher.stewart@northumbria.ac.uk](mailto:christopher.stewart@northumbria.ac.uk)

**Supplementary Table S1** – Raw 16S profiling dataset

**Supplementary Table S2** – Raw LCMS metabolomics dataset

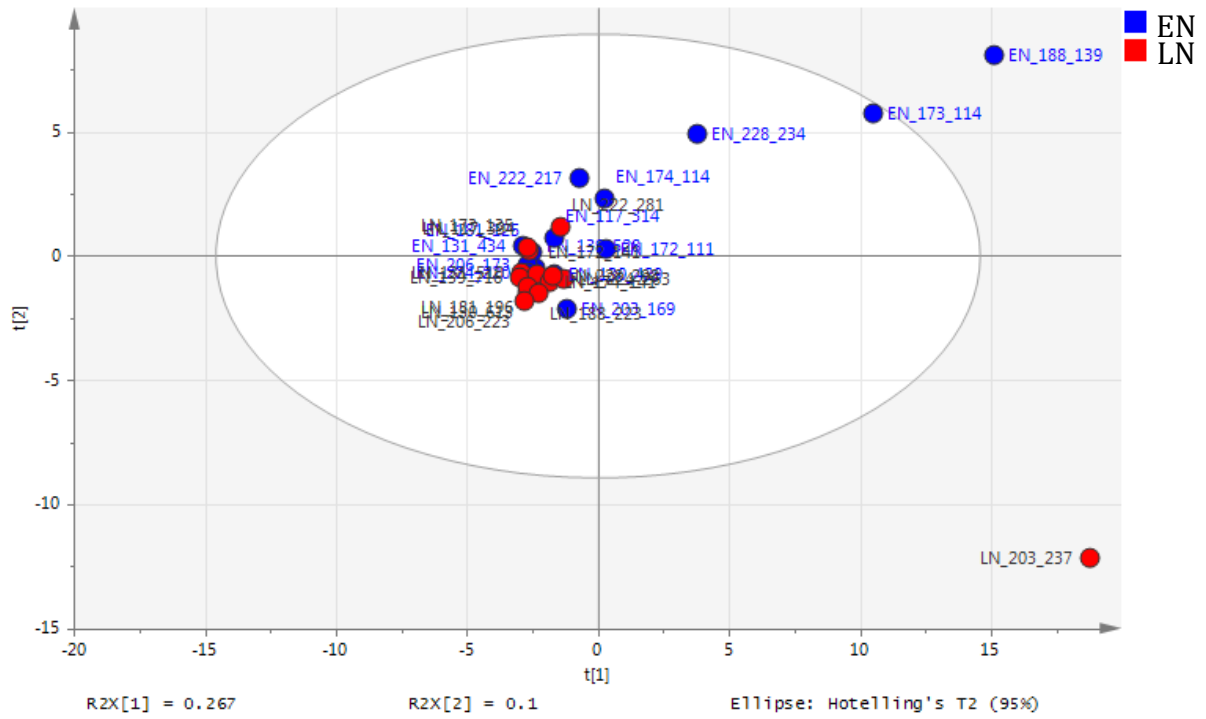

**Supplementary Figure S1 - Bacterial profiling PCA of only NICU samples.** Coloured according to time point. EN-LN  $P = 0.002$ .

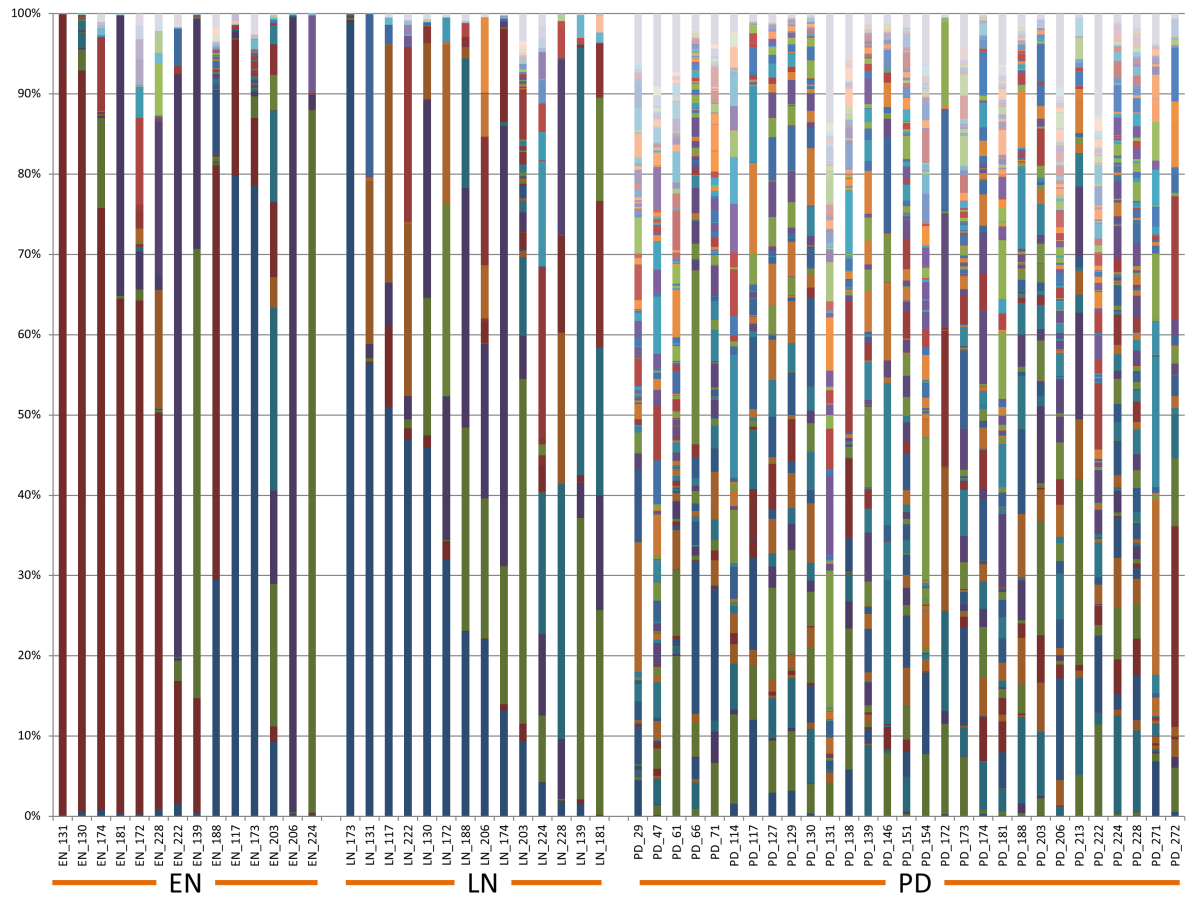

**Supplementary Figure S2 – Bacterial profiling bar charts of individual samples at each time point.**

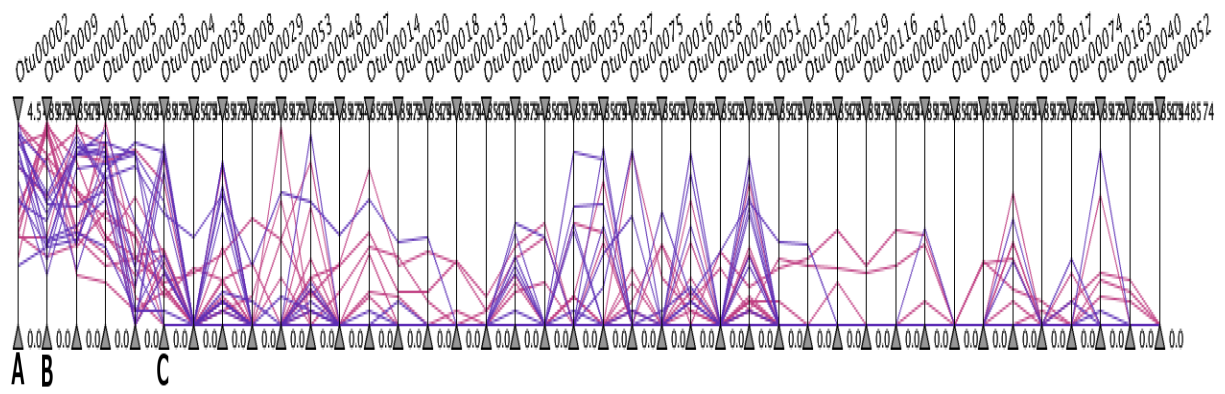

**Supplementary Figure S3 – Parallel Coordinates displaying the bacterial profiles of EN (pink) and LN (purple) samples for the 40 most abundant OTUs. Letters indicate OTUs displaying increase or decrease from EN to LN. A = *S. aureus*, B= *Veillonella* sp., C = *K. oxytocea*.**

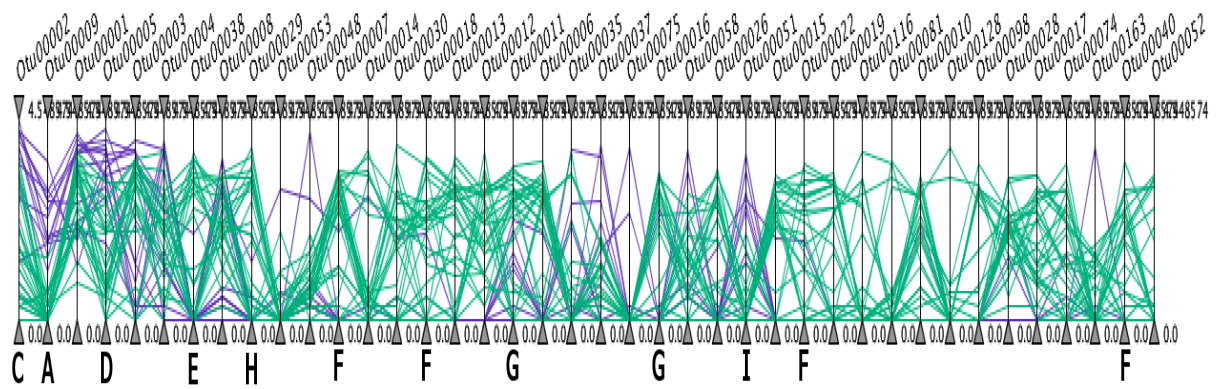

**Supplementary Figure S4 - Parallel Coordinates displaying the bacterial profiles of LN (purple) and PD (green) samples for the 40 most abundant OTUs. Letters indicates OTUs displaying increase or decrease from LN to PD. A = *S. aureus*, C = *K. oxytocea*, D = *E. faecalis*, I = *Clostridium sensu stricto*, E = *Akkermansia sp*, F = *Blautia sp*, G = *Bacteoides sp*, H = *Collinsella sp*.**

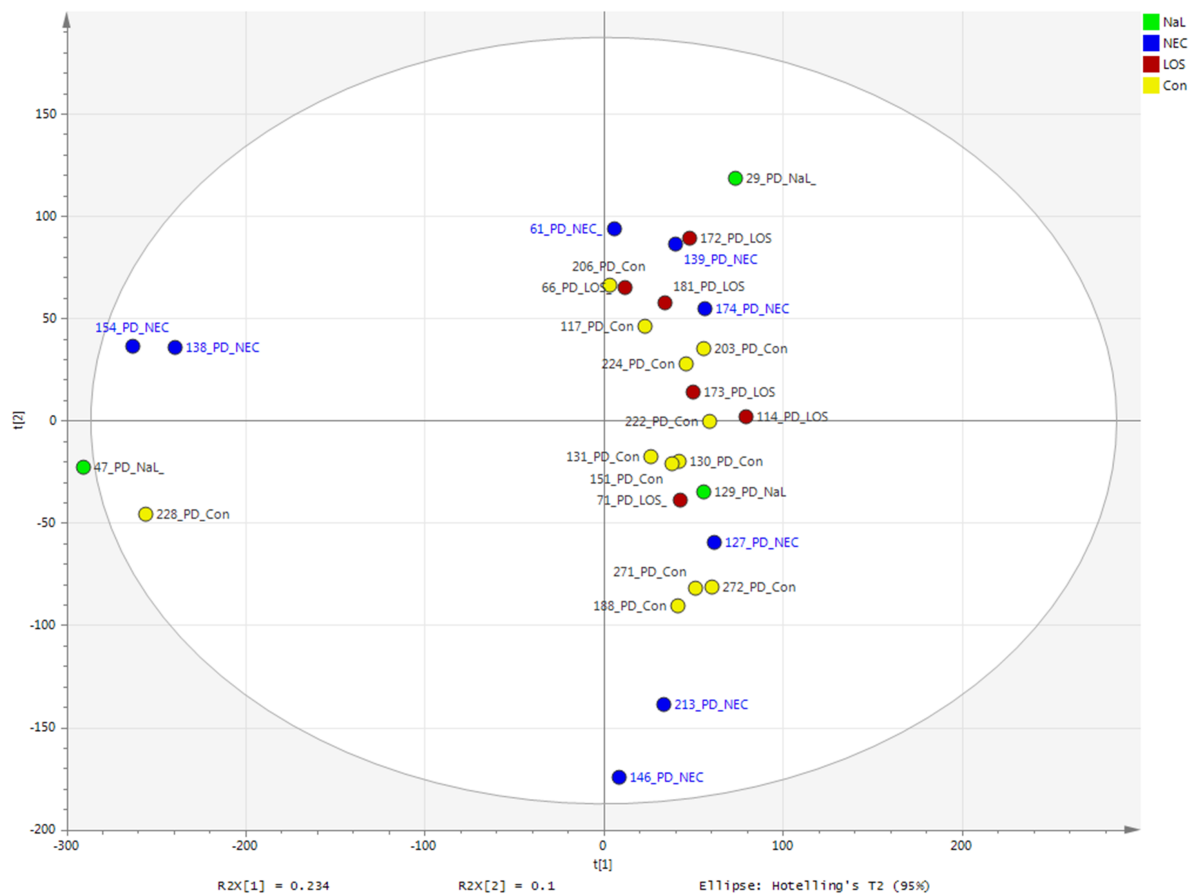

**Supplementary Figure S5 – Metabolomic profiling PCA score plot and PLS-DA loadings of post discharge samples stratified according to previous disease diagnosis. A) PCA. PLS-DA Loadings – NaL R2 0.46, Q2 -0.09; NEC R2 0.12, Q2 -0.12; LOS R2 0.14, Q2 -0.07; CON R2 0.60, Q2 -0.00.**

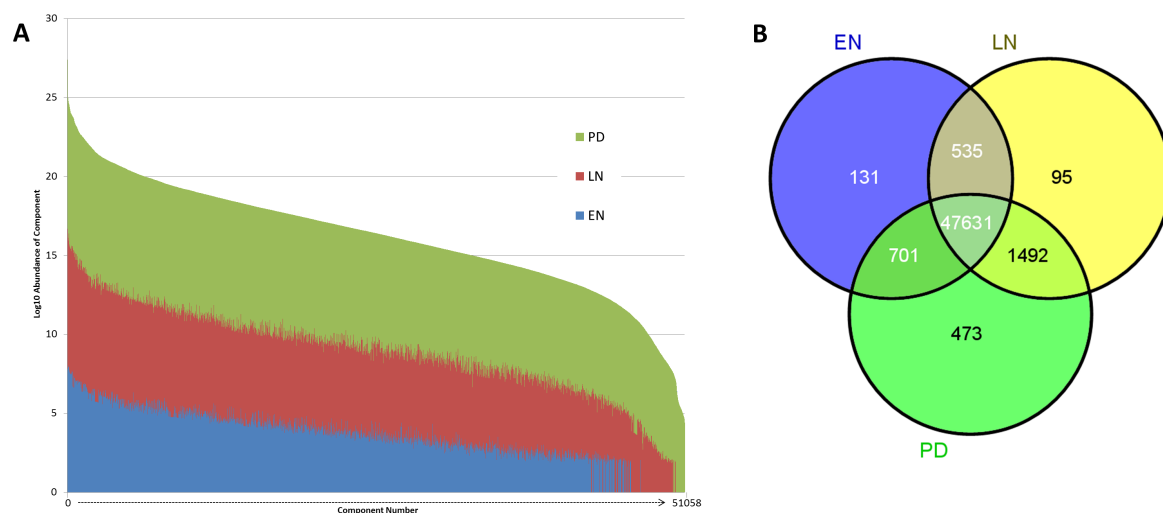

**Supplementary Figure S6 – Number and relative intensity of metabolites between the groups.** A) Stacked bar chart comparison showing the average log<sub>10</sub> abundance of each metabolite detected at each time point. B) Venn diagram showing the presence and absence of metabolites across the groups.



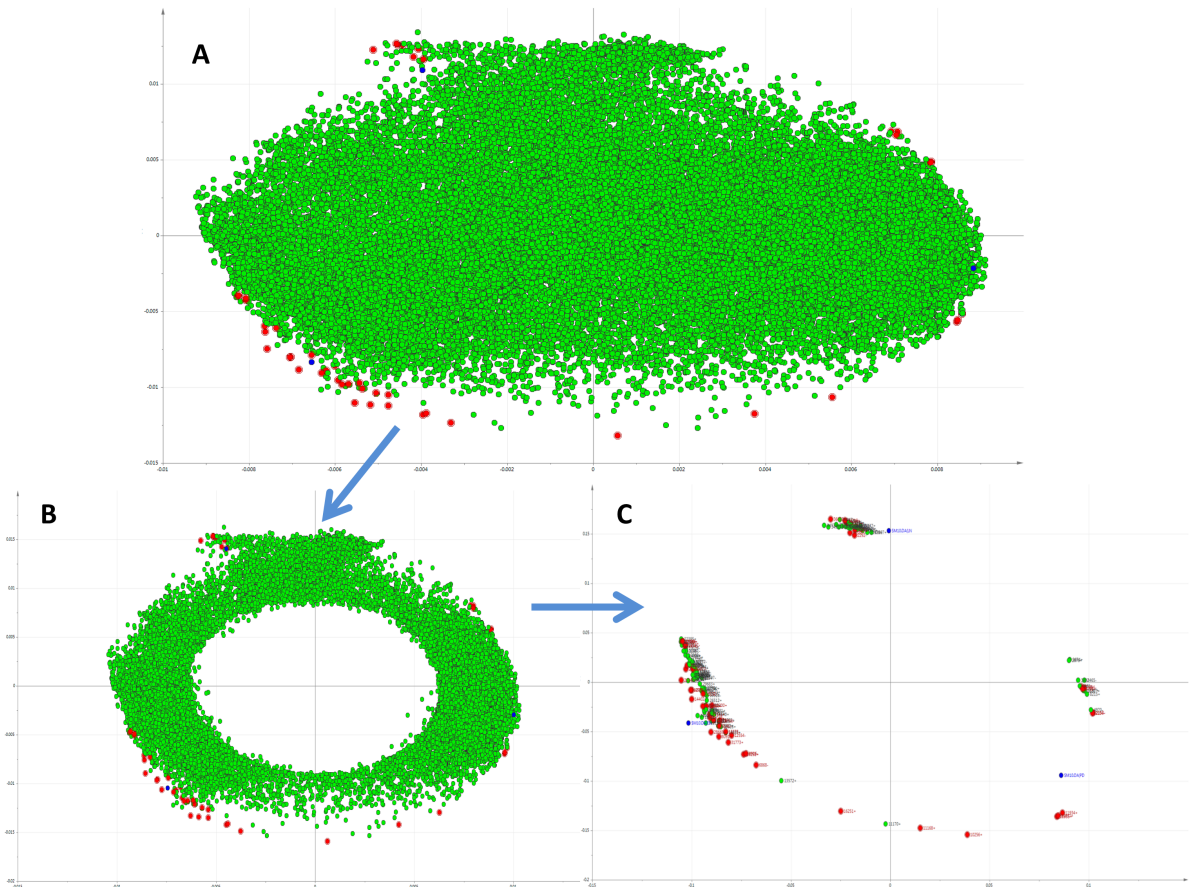

**Supplementary Figure S7 – PLS-DA Loadings through multiple iterations of ‘VIP’ to remove noise.** Blue circles represent the groups; EN – Early NICU, LN – Late NICU, PD – Post Discharge, Green circles are component where red components show the most significant metabolites which underwent MS2. A) Raw data. B) First round of VIP. C) Final loadings.
